# Supplementary material for: Crystal Structure and Solid-State Packing of 4-Chloro-5H-1,2,3-dithiazol-5-one and 4-Chloro-5H-1,2,3-dithiazole-5-thione
Source: MDPI journal article supplement (doi:10.3390/molecules26195875), 2021-09-28
Supplement: s1 [file s1]

## Crystal Structures and Solid-State Packing of 4-Chloro-5*H*-1,2,3-dithiazol-5-one and 4-Chloro-5*H*-1,2,3-dithiazole-5-thione

Christos P. Constantinides<sup>2,\*</sup> Maria Koyioni,<sup>1</sup> Fadwat Bazzi,<sup>2</sup> Maria Manoli,<sup>1</sup> Daniel B. Lawson<sup>2</sup> and Panayiotis A. Koutentis<sup>1</sup>

<sup>1</sup> Department of Chemistry, University of Cyprus, P.O. Box 20537, 1678 Nicosia, Cyprus

<sup>2</sup> Department of Natural Sciences, University of Michigan – Dearborn, 4901 Evergreen Road, Dearborn, MI 48128-1491, United States

\* Correspondence e-mail: cconst@umich.edu Fax: +01 3135934937 Tel: +01 3135836728

### Supplementary Information

| Title                                                                                                                                                                                           | Page no. |
|-------------------------------------------------------------------------------------------------------------------------------------------------------------------------------------------------|----------|
| <b>Table S1.</b> Crystallographic data for 1,2,3-dithiazol-5-ones/thiones <b>2b</b> , <b>2c-<math>\alpha</math></b> and <b>2c-<math>\beta</math></b> .                                          | 4        |
| <b>Table S2.</b> Intramolecular geometrical parameters for literature 5 <i>H</i> -1,2,3-dithiazoles <b>3</b> , <b>4</b> and <b>5</b> .                                                          | 5        |
| <b>Table S3.</b> Symmetry operators in crystal packing of dithiazolone <b>2b</b> and thiones <b>2c-<math>\alpha</math></b> and <b>2c-<math>\beta</math></b> .                                   | 6        |
| <b>Figure S1.</b> Crystal packing of dithiazolone <b>2b</b> along the <i>c</i> -axis (a) and along the <i>bc</i> -diagonal.                                                                     | 7        |
| <b>Figure S2.</b> Crystal packing of dithiazolethione <b>2c-<math>\alpha</math></b> along the <i>a</i> -axis (a); along the <i>b</i> -axis (b); along the <i>ac</i> -diagonal (c).              | 8        |
| <b>Figure S3.</b> Crystal packing of dithiazolethione <b>2c-<math>\beta</math></b> showing the formation of 2D sheets (a) and the parallel stacking of the sheets along the <i>a</i> -axis (b). | 9        |



|                                                                                                                                                   |    |
|---------------------------------------------------------------------------------------------------------------------------------------------------|----|
| <b>Table S4.</b> Percentage difference between the experimental and computational bond lengths (Å) of the dithiazolone <b>2b</b> .                | 10 |
| <b>Table S5.</b> Weighted standard deviation (WSD) between the experimental and computational bond lengths (Å) of the dithiazolone <b>2b</b> .    | 10 |
| <b>Table S6.</b> Percentage difference between the experimental and computational bond angles (°) of the dithiazolone <b>2b</b> .                 | 11 |
| <b>Table S7.</b> Weighted standard deviation (WSD) between the experimental and computational bond angles of the dithiazolone <b>2b</b> .         | 11 |
| <b>Table S8.</b> Percentage difference between the experimental and computational bond lengths (Å) of dithiazoethione <b>2c</b> .                 | 12 |
| <b>Table S9.</b> Weighted standard deviation (WSD) between the experimental and computational bond lengths (Å) of the dithiazoethione <b>2c</b> . | 12 |
| <b>Table S10.</b> Percentage difference between the experimental and computational bond angles (°) of dithiazoethione <b>2c</b> .                 | 13 |
| <b>Table S11.</b> Weighted standard deviation (WSD) between the experimental and computational bond angles of the dithiazoethione <b>2c</b> .     | 13 |
| <b>Table S12.</b> Condensed electrophilic Fukui functions ( $f^+$ ) for dithiazolone <b>2b</b> .                                                  | 14 |
| <b>Table S13.</b> Condensed nucleophilic Fukui functions ( $f^-$ ) for dithiazolone <b>2b</b> .                                                   | 14 |
| <b>Table S14.</b> Condensed radicalary attack Fukui functions ( $f^0$ ) for dithiazolone <b>2b</b> .                                              | 15 |
| <b>Table S15.</b> Condensed electrophilic Fukui functions ( $f^+$ ) for dithiazoethione <b>2c</b> .                                               | 15 |
| <b>Table S16.</b> Condensed nucleophilic Fukui functions ( $f^-$ ) for dithiazoethione <b>2c</b> .                                                | 16 |
| <b>Table S17.</b> Condensed radicalary attack Fukui functions ( $f^0$ ) for dithiazoethione <b>2c</b> .                                           | 16 |
| <b>Table S18.</b> Condensed electrophilic Fukui functions ( $f^+$ ) of Appel's salt <b>1</b> .                                                    | 17 |
| <b>Table S19.</b> Condensed nucleophilic Fukui functions ( $f^-$ ) of Appel's salt <b>1</b> .                                                     | 18 |



|                                                                                                    |    |
|----------------------------------------------------------------------------------------------------|----|
| <b>Table S20.</b> Condensed radicalary attack Fukui functions ( $f^0$ ) of Appel's salt <b>1</b> . | 18 |
| <b>Table S21.</b> Experimental and computational bond lengths (Å) of the Appel's salt <b>1</b> .   | 19 |
| <b>Table S22.</b> Experimental and computational bond angles (°) of the Appel's salt <b>1</b> .    | 19 |



**Table S1.** Crystallographic data for 1,2,3-dithiazol-5-ones/thiones **2b**, **2c- $\alpha$**  and **2c- $\beta$** .

|                                                                                | <b>2b</b>                          | <b>2c-<math>\alpha</math></b>     | <b>2c-<math>\beta</math></b>     |
|--------------------------------------------------------------------------------|------------------------------------|-----------------------------------|----------------------------------|
| CCDC Number                                                                    | 2106260                            | 2106261                           | 2106262                          |
| <b>Crystal Data</b>                                                            |                                    |                                   |                                  |
| Formula                                                                        | C <sub>2</sub> ClNS <sub>2</sub> O | C <sub>2</sub> ClNS <sub>3</sub>  | C <sub>2</sub> ClNS <sub>3</sub> |
| Formula weight, g·mol <sup>-1</sup>                                            | 153.60                             | 169.66                            | 169.66                           |
| Crystal system                                                                 | Orthorhombic                       | Orthorhombic                      | Triclinic                        |
| Space group                                                                    | <i>P b c a</i>                     | <i>P b c a</i>                    | <i>P -1</i>                      |
| <i>a</i> , <i>b</i> , <i>c</i> , Å                                             | 5.6128(3), 12.4796(9), 14.3419(9)  | 11.0262(5), 7.2698(3), 13.3111(8) | 7.113(5), 13.323(5), 18.343(5)   |
| $\alpha$ , $\beta$ , $\gamma$ °                                                | 90.00, 90.00, 90.00                | 90.00, 90.00, 90.00               | 76.886(5), 82.914(5), 76.429(5)  |
| <i>V</i> , Å <sup>3</sup>                                                      | 1004.59(11)                        | 1067.00(9)                        | 1641.2(14)                       |
| <i>Z</i>                                                                       | 8                                  | 8                                 | 12                               |
| $\rho_{\text{calc}}$ , g·cm <sup>-3</sup>                                      | 2.031                              | 2.112                             | 2.060                            |
| $\mu$ , mm <sup>-1</sup>                                                       | 13.408 (Cu Ka)                     | 16.122 (Cu Ka)                    | 1.694 (Mo Ka)                    |
| <i>F</i> (000)                                                                 | 608                                | 672                               | 1008                             |
| Crystal size, mm <sup>3</sup>                                                  | 0.12 × 0.07 × 0.05                 | 0.17 × 0.17 × 0.02                | 0.11 × 0.03 × 0.01               |
| <b>Data Collection <sup>a</sup></b>                                            |                                    |                                   |                                  |
| <i>T</i> , K                                                                   | 100(2)                             | 100(2)                            | 100(2)                           |
| $\lambda^a$ , Å                                                                | 1.54184                            | 1.54184                           | 0.71073                          |
| $\theta$ (min, max), °                                                         | 6.17, 72.06                        | 6.65, 66.96                       | 2.95, 25.00                      |
| Dataset ( <i>-h</i> , <i>h</i> ; <i>-k</i> , <i>k</i> ; <i>-l</i> , <i>l</i> ) | -5, 6; -14, 15; -13, 17            | -13, 12; -3, 8; -15, 15           | -5, 8; -15, 15; -21, 21          |
| Meas./ indep. refl. ( <i>R</i> <sub>int</sub> )                                | 3093 / 982 (0.0246)                | 5321 / 953 (0.1001)               | 10938 / 5782 (0.0911)            |
| Obs. refl. [ <i>I</i> > 2 $\sigma$ ( <i>I</i> )]                               | 946                                | 944                               | 3131                             |
| <b>Refinement</b>                                                              |                                    |                                   |                                  |
| <i>R</i> <sub>1</sub> <sup>b</sup>                                             | 0.0261                             | 0.0680                            | 0.0845                           |
| <i>wR</i> <sub>2</sub> <sup>c</sup>                                            | 0.0663                             | 0.1993                            | 0.2120                           |
| Goodness of fit on <i>F</i> <sup>2</sup>                                       | 1.112                              | 1.077                             | 0.981                            |
| Min, max resd density, e.Å <sup>-3</sup>                                       | 0.264/ -0.381                      | 0.836/ -1.097                     | 0.228/ -0.806                    |

<sup>a</sup> Graphite monochromator.

$$^b R_1 = \Sigma \|F_o\| - \|F_c\| / \Sigma \|F_o\|$$

$$^c wR_2 = [\Sigma [w(F_o^2 - F_c^2)^2] / \Sigma [wF_o^2]^2]^{1/2}, w = 1/[\sigma^2(F_o^2) + (m \cdot p)^2 + n \cdot p], p = [\max(F_o^2, 0) + 2F_c^2]/3$$



**Table S2.** Intramolecular geometrical parameters for literature 5*H*-1,2,3-dithiazoles **3**, **4** and **5**.

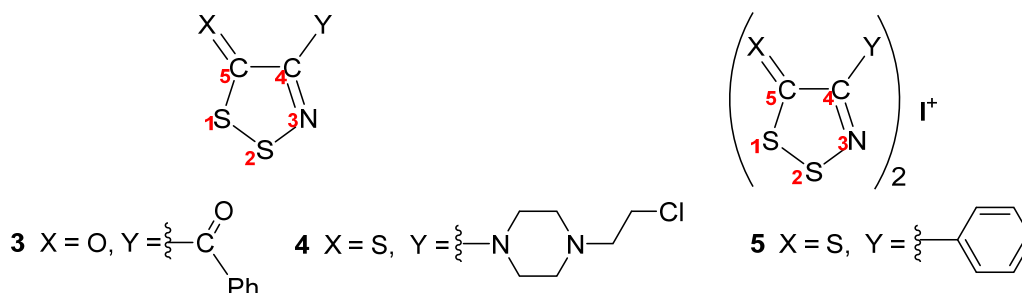

| Compound                  | Bonds | Bond Length (Å)   | Angles   | Bond Angles (°)   |
|---------------------------|-------|-------------------|----------|-------------------|
| <b>3</b><br>CCDC: 1522822 | C5–S1 | 1.802(2)          | C5–S1–S2 | 93.70(6)          |
|                           | S1–S2 | 2.0431(6)         | S1–S2–N3 | 98.59(6)          |
|                           | S2–N3 | 1.628(1)          | S2–N3–C4 | 118.2(1)          |
|                           | N3–C4 | 1.299(2)          | N3–C4–C5 | 119.8(1)          |
|                           | C5–C4 | 1.485(2)          | N3–C4–Y  | 119.7(1)          |
|                           | C5–X  | 1.211(2)          | C5–C4–Y  | 120.4(1)          |
|                           | C4–Y  | 1.502(2)          | C4–C5–S1 | 109.7(1)          |
|                           |       |                   | C4–C5–X  | 128.7(1)          |
|                           |       |                   | S1–C5–X  | 121.6(1)          |
|                           | C5–S1 | 1.727(2)          | C5–S1–S2 | 95.14(7)          |
|                           | S1–S2 | 2.0619(7)         | S1–S2–N3 | 96.31(6)          |
|                           | S2–N3 | 1.644(2)          | S2–N3–C4 | 118.2(1)          |
|                           | N3–C4 | 1.309(2)          | N3–C4–C5 | 119.0(2)          |
|                           | C5–C4 | 1.473(3)          | N3–C4–Y  | 120.1(2)          |
| <b>4</b><br>CCDC: 1426477 | C5–X  | 1.657(2)          | C5–C4–Y  | 120.7(2)          |
|                           | C4–Y  | 1.391(3)          | C4–C5–S1 | 111.2(1)          |
|                           |       |                   | C4–C5–X  | 128.0(1)          |
|                           |       |                   | S1–C5–X  | 120.7(1)          |
|                           | C5–S1 | 1.706(6)-1.708(6) | C5–S1–S2 | 93.3(2)-93.4(2)   |
|                           | S1–S2 | 2.066(2)-2.069(2) | S1–S2–N3 | 97.2(2)           |
|                           | S2–N3 | 1.617(6)-1.626(5) | S2–N3–C4 | 117.7(4)-117.9(4) |
|                           | N3–C4 | 1.309(8)-1.315(8) | N3–C4–C5 | 118.0(5)-118.2(5) |
|                           | C5–C4 | 1.450(8)-1.454(8) | N3–C4–Y  | 118.9(5)-119.3(5) |
|                           | C5–X  | 1.693(6)-1.694(6) | C5–C4–Y  | 122.6(5)-122.9(5) |
|                           | C4–Y  | 1.476(8)-1.483(8) | C4–C5–S1 | 113.3(4)-113.8(4) |
|                           |       |                   | C4–C5–X  | 122.6(4)-122.7(4) |
|                           |       |                   | S1–C5–X  | 123.7(3)-124.0(4) |
|                           |       |                   |          |                   |

<sup>a</sup> Bond lengths and angles given for both dithiazole rings in the S–I<sup>+</sup>–S complex.



**Table S3.** Symmetry operators in crystal packing of dithiazolone **2b** and thiones **2c- $\alpha$**  and **2c- $\beta$** .

| Compound                      | Symmetry Operators | Description                                                                              |
|-------------------------------|--------------------|------------------------------------------------------------------------------------------|
| <b>2b</b>                     | x,y,z              | Identity                                                                                 |
|                               | 1/2-x,-y,1/2+z     | 2-fold screw axis with direction [0, 0, 1] at 1/4, 0, z with screw component [0, 0, 1/2] |
|                               | 1/2+x,1/2-y,-z     | 2-fold screw axis with direction [1, 0, 0] at x, 1/4, 0 with screw component [1/2, 0, 0] |
|                               | -x,1/2+y,1/2-z     | 2-fold screw axis with direction [0, 1, 0] at 0, y, 1/4 with screw component [0, 1/2, 0] |
|                               | -x,-y,-z           | Inversion at [0, 0, 0]                                                                   |
|                               | 1/2+x,y,1/2-z      | Glide plane perpendicular to [0, 0, 1] with glide component [1/2, 0, 0]                  |
|                               | 1/2-x,1/2+y,z      | Glide plane perpendicular to [1, 0, 0] with glide component [0, 1/2, 0]                  |
| <b>2c-<math>\alpha</math></b> | x,1/2-y,1/2+z      | Glide plane perpendicular to [0, 1, 0] with glide component [0, 0, 1/2]                  |
|                               | x,y,z              | Identity                                                                                 |
|                               | 1/2-x,-y,1/2+z     | 2-fold screw axis with direction [0, 0, 1] at 1/4, 0, z with screw component [0, 0, 1/2] |
|                               | -x,1/2+y,1/2-z     | 2-fold screw axis with direction [0, 1, 0] at 0, y, 1/4 with screw component [0, 1/2, 0] |
|                               | 1/2+x,1/2-y,-z     | 2-fold screw axis with direction [1, 0, 0] at x, 1/4, 0 with screw component [1/2, 0, 0] |
|                               | -x,-y,-z           | Inversion at [0, 0, 0]                                                                   |
|                               | 1/2+x,y,1/2-z      | Glide plane perpendicular to [0, 0, 1] with glide component [1/2, 0, 0]                  |
| <b>2c-<math>\beta</math></b>  | x,1/2-y,1/2+z      | Glide plane perpendicular to [0, 1, 0] with glide component [0, 0, 1/2]                  |
|                               | 1/2-x,1/2+y,z      | Glide plane perpendicular to [1, 0, 0] with glide component [0, 1/2, 0]                  |
|                               | x,y,z              | Identity                                                                                 |
|                               | -x,-y,-z           | Inversion at [0, 0, 0]                                                                   |



**Figure S1.** Crystal packing of dithiazolone **2b** along the *c*-axis (a) and along the *bc*-diagonal showing the shortest intermolecular contacts (Å).

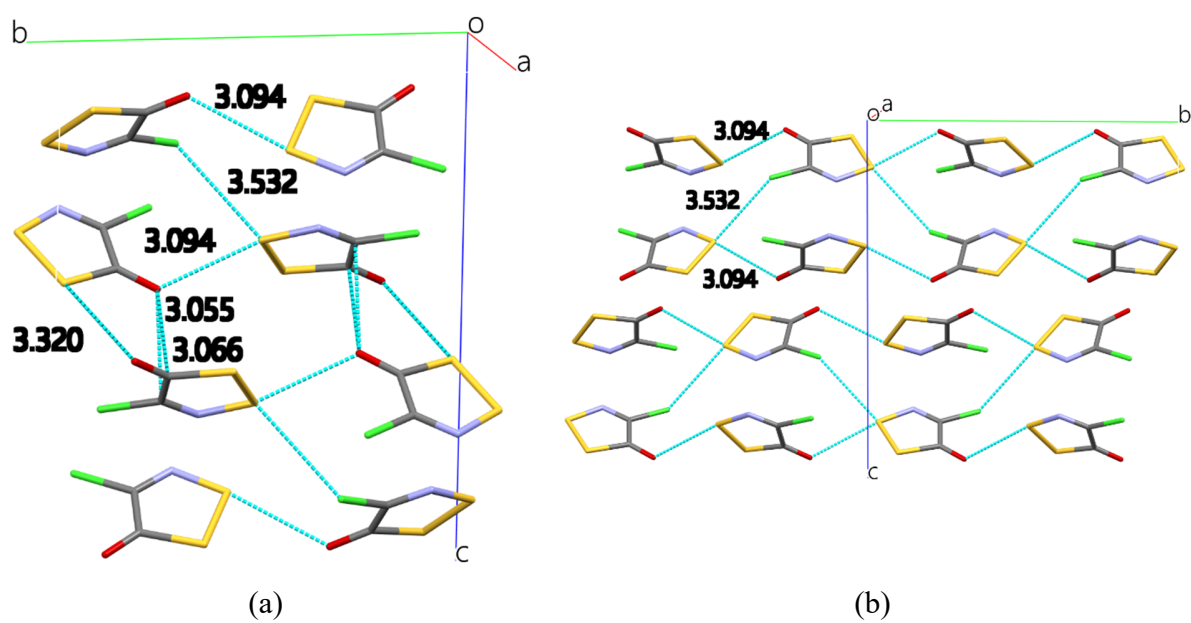



**Figure S2.** Crystal packing of dithiazoledithione **2c- $\alpha$**  along the *a*-axis (a); along the *b*-axis (b); along the *ac*-diagonal (c) showing the shortest intermolecular contacts (Å).

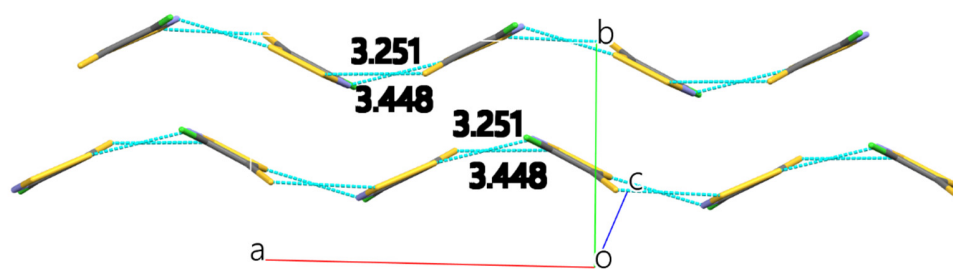

(a)

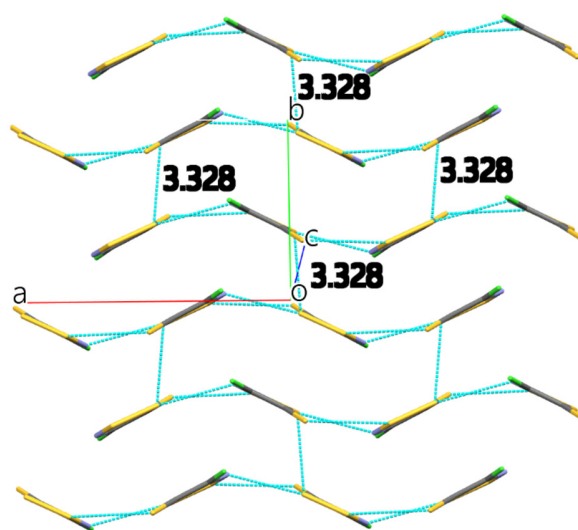

(b)

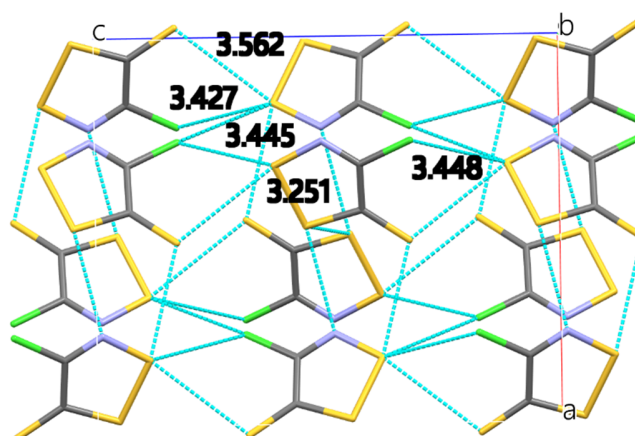

(c)



**Figure S3.** Crystal packing of dithiazoethione **2c- $\beta$**  showing the formation of 2D sheets (a) and the parallel stacking of the sheets along the *a*-axis (b). Shortest intermolecular contacts (Å) are omitted for clarity purposes. Please see text for comments of intermolecular contacts.

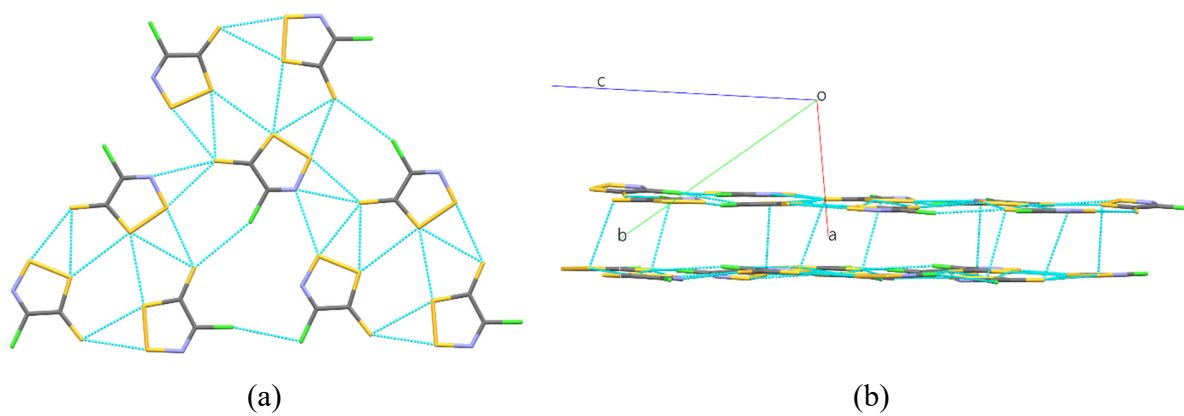



**Table S4.** Percentage difference between the experimental and computational bond lengths (Å) of the dithiazolone **2b**.

| Bonds   | B3LYP | BLYP  | M06   | mPW1PW | PBE   | MP2   | average |
|---------|-------|-------|-------|--------|-------|-------|---------|
| C5–S1   | 2.1%  | -4.5% | -2.0% | -1.1%  | -1.1% | -1.1% | -1.3%   |
| S1–S2   | 1.4%  | -2.6% | -0.7% | -0.1%  | 0.0%  | 0.2%  | -0.3%   |
| S2–N3   | -0.2% | -0.7% | 0.9%  | 0.9%   | 1.0%  | 0.6%  | 0.4%    |
| N3–C4   | 0.6%  | -1.7% | -0.2% | -0.4%  | -0.5% | -2.2% | -0.7%   |
| C5–C4   | 1.1%  | -1.3% | -0.7% | -0.7%  | -0.7% | -0.3% | -0.4%   |
| C5–O    | -0.9% | -0.1% | 1.5%  | 1.2%   | 1.1%  | -0.2% | 0.4%    |
| C4–Cl   | 0.2%  | -1.3% | 0.3%  | 0.7%   | 0.8%  | 0.8%  | 0.2%    |
| average | 0.6%  | -1.7% | -0.1% | 0.1%   | 0.1%  | -0.3% |         |

**Table S5.** Weighted standard deviation (WSD) between the experimental and computational bond lengths (Å) of the dithiazolone **2b**.

| Bonds | B3LYP | BLYP | M06  | mPW1PW | PBE  | MP2  |
|-------|-------|------|------|--------|------|------|
| C5–S1 | 19.0  | 39.5 | 18.0 | 10.0   | 9.5  | 9.5  |
| S1–S2 | 42.4  | 75.3 | 21.0 | 3.9    | -0.4 | -4.7 |
| S2–N3 | -1.5  | 6.0  | -7.5 | -7.5   | -8.0 | -5.0 |
| N3–C4 | 2.3   | 7.3  | 0.7  | 1.7    | 2.0  | 9.3  |
| C5–C4 | 8.0   | 9.5  | 5.0  | 5.0    | 5.0  | 2.0  |
| C5–O  | -5.5  | 0.5  | -9.0 | -7.0   | -6.5 | 1.5  |
| C4–Cl | 2.0   | 11.5 | -2.5 | -6.0   | -7.0 | -6.5 |

The values in the table are computed as:

$$(R_{eq,calc} - R_{eq,exptl}) / \text{uncertainty} = \text{multiple of the WSD}$$



**Table S6.** Percentage difference between the experimental and computational bond angles (°) of the dithiazolone **2b**.

| Angles   | B3LYP | BLYP  | M06   | mPW1PW | PBE   | MP2   | average |
|----------|-------|-------|-------|--------|-------|-------|---------|
| C5–S1–S2 | 0.7%  | 1.2%  | 0.7%  | 0.3%   | 0.2%  | -0.2% | 0.5%    |
| S1–S2–N3 | 0.2%  | -0.2% | 0.0%  | -0.1%  | -0.1% | -0.6% | -0.1%   |
| S2–N3–C4 | -1.6% | -1.3% | -1.6% | -1.4%  | -1.3% | -0.2% | -1.2%   |
| N3–C4–C5 | 0.9%  | 0.3%  | 0.8%  | 1.1%   | 1.1%  | 0.5%  | 0.8%    |
| N3–C4–Cl | -0.5% | 0.1%  | -0.9% | -0.7%  | -0.7% | -0.1% | -0.5%   |
| C5–C4–Cl | -0.5% | -0.4% | 0.0%  | -0.5%  | -0.5% | -0.5% | -0.4%   |
| C4–C5–S1 | -0.2% | 0.1%  | 0.2%  | -0.1%  | 0.0%  | 0.2%  | 0.0%    |
| C4–C5–O  | -0.7% | -1.3% | -0.9% | -0.7%  | -0.7% | -0.8% | -0.8%   |
| S1–C5–O  | 0.9%  | 1.2%  | 0.8%  | 0.7%   | 0.7%  | 0.6%  | 0.8%    |
| average  | -0.1% | 0.0%  | -0.1% | -0.1%  | -0.1% | -0.1% |         |

**Table S7.** Weighted standard deviation (WSD) between the experimental and computational bond angles of the dithiazolone **2b**.

| Angles   | B3LYP | BLYP  | M06   | mPW1PW | PBE1PBE | MP2  |
|----------|-------|-------|-------|--------|---------|------|
| C5–S1–S2 | -11.0 | -19.2 | -10.3 | -4.3   | -3.5    | 3.3  |
| S1–S2–N3 | -3.4  | 2.6   | 0.4   | 0.9    | 1.7     | 7.9  |
| S2–N3–C4 | 19.4  | 15.5  | 18.3  | 16.2   | 15.2    | 2.0  |
| N3–C4–C5 | -5.7  | -1.7  | -4.7  | -6.8   | -6.7    | -3.2 |
| N3–C4–Cl | 6.3   | -0.7  | 10.7  | 8.4    | 8.7     | 1.1  |
| C5–C4–Cl | 6.2   | 5.2   | -0.3  | 6.2    | 5.9     | 6.3  |
| C4–C5–S1 | 2.1   | -1.2  | -1.9  | 0.6    | 0.3     | -1.9 |
| C4–C5–O  | 4.5   | 8.1   | 5.9   | 4.3    | 4.3     | 5.0  |
| S1–C5–O  | -11.0 | -15.0 | -9.9  | -9.0   | -8.8    | -7.9 |

The values in the table are computed as:

$$(\angle_{eq,calc} - \angle_{eq,exptl}) / \text{uncertainty} = \text{multiple of the WSD}$$



**Table S8.** Percentage difference between the experimental and computational bond lengths (Å) of dithiazolethione **2c**.

| Bonds   | B3LYP | BLYP  | M06   | mPW1PW | PBE1PBE | MP2   | average |
|---------|-------|-------|-------|--------|---------|-------|---------|
| C5–S1   | -0.5% | -1.8% | -0.1% | 0.3%   | 0.3%    | 0.0%  | -0.3%   |
| S1–S2   | -1.4% | -3.1% | -0.7% | 0.0%   | 0.1%    | 0.4%  | -0.8%   |
| S2–N3   | 0.3%  | -0.8% | 1.0%  | 1.0%   | 1.1%    | 0.9%  | 0.6%    |
| N3–C4   | -0.1% | -1.2% | 0.3%  | 0.1%   | 0.0%    | -2.0% | -0.5%   |
| C5–C4   | -0.1% | -0.3% | 0.3%  | 0.3%   | 0.3%    | 0.9%  | 0.2%    |
| C5–S    | 0.2%  | -0.7% | 0.5%  | 0.6%   | 0.6%    | -0.3% | 0.2%    |
| C4–Cl   | -0.1% | -1.2% | 0.4%  | 0.9%   | 1.0%    | 0.9%  | 0.3%    |
| average | -0.2% | -1.3% | 0.3%  | 0.5%   | 0.5%    | 0.1%  |         |

**Table S9.** Weighted standard deviation (WSD) between the experimental and computational bond lengths (Å) of the dithiazolethione **2c**.

| Bonds | B3LYP | BLYP | M06  | mPW1PW | PBE  | MP2  |
|-------|-------|------|------|--------|------|------|
| C5–S1 | 2.3   | 8.0  | 0.6  | -1.1   | -1.3 | -0.1 |
| S1–S2 | 14.5  | 32.0 | 7.1  | 0.1    | -1.2 | -4.3 |
| S2–N3 | -1.2  | 3.3  | -4.1 | -4.3   | -4.4 | -3.7 |
| N3–C4 | 0.2   | 2.7  | -0.7 | -0.3   | -0.1 | 4.3  |
| C5–C4 | 0.2   | 0.8  | -0.8 | -0.6   | -0.7 | -2.2 |
| C5–S  | -0.8  | 3.0  | -2.2 | -2.7   | -2.5 | 1.2  |
| C4–Cl | 0.5   | 5.3  | -1.8 | -3.7   | -4.1 | -4.0 |



**Table S10.** Percentage difference between the experimental and computational bond angles (°) of dithiazolethione **2c**.

| Angles   | B3LYP | BLYP  | M06   | mPW1PW | PBE1PBE | MP2   | average |
|----------|-------|-------|-------|--------|---------|-------|---------|
| C5–S1–S2 | 0.9%  | 1.3%  | 0.9%  | 0.6%   | 0.6%    | 0.4%  | 0.8%    |
| S1–S2–N3 | 0.5%  | 0.6%  | 0.2%  | 0.0%   | -0.1%   | -0.8% | 0.1%    |
| S2–N3–C4 | -1.2% | -0.9% | -1.1% | -0.9%  | -0.8%   | 0.4%  | -0.8%   |
| N3–C4–C5 | 0.8%  | 0.2%  | 0.8%  | 1.0%   | 1.0%    | 0.6%  | 0.7%    |
| N3–C4–Cl | -0.9% | -0.4% | -1.3% | -1.3%  | -1.3%   | -0.6% | -1.0%   |
| C5–C4–Cl | 0.0%  | 0.2%  | 0.5%  | 0.2%   | 0.2%    | 0.0%  | 0.2%    |
| C4–C5–S1 | -0.9% | -1.0% | -0.7% | -0.8%  | -0.8%   | -0.7% | -0.8%   |
| C4–C5–S  | -0.9% | -1.5% | -1.1% | -0.8%  | -0.7%   | -0.7% | -1.0%   |
| S1–C5–S  | 1.7%  | 2.3%  | 1.7%  | 1.4%   | 1.4%    | 1.3%  | 1.6%    |
| average  | 0.0%  | 0.1%  | 0.0%  | -0.1%  | -0.1%   | 0.0%  |         |

**Table S11.** Weighted standard deviation (WSD) between the experimental and computational bond angles of the dithiazolethione **2c**.

| Angles   | B3LYP | BLYP  | M06   | mPW1PW | PBE  | MP2  |
|----------|-------|-------|-------|--------|------|------|
| C5–S1–S2 | -8.6  | -12.0 | -8.2  | -5.8   | -5.3 | -3.4 |
| S1–S2–N3 | -2.3  | -2.8  | -1.2  | 0.0    | 0.4  | 4.1  |
| S2–N3–C4 | 4.8   | 3.6   | 4.3   | 3.5    | 3.2  | -1.5 |
| N3–C4–C5 | -2.6  | -0.7  | -2.3  | -3.2   | -3.2 | -1.7 |
| N3–C4–Cl | 3.6   | 1.7   | 5.1   | 5.0    | 5.1  | 2.3  |
| C5–C4–Cl | -0.1  | -0.7  | -2.0  | -0.8   | -0.8 | 0.0  |
| C4–C5–S1 | 3.4   | 3.5   | 2.7   | 2.9    | 2.9  | 2.5  |
| C4–C5–S  | 4.0   | 6.2   | 4.6   | 3.2    | 3.2  | 3.1  |
| S1–C5–S  | -10.6 | -14.2 | -10.5 | -8.7   | -8.6 | -7.9 |



**Table S12.** Condensed electrophilic Fukui functions ( $f^+$ ) (initial site of nucleophilic attack) with the B3LYP, BLYP, M06, mPW1PW, and PBE1PBE and the def2-TZVPD basis set for dithiazolone **2b**.<sup>a</sup>

| Atom | B3LYP  | BLYP  | M06    | mPW1PW | PBE    |
|------|--------|-------|--------|--------|--------|
| S1   | 0.217  | 0.223 | 0.217  | 0.210  | 0.209  |
| S2   | 0.343  | 0.305 | 0.348  | 0.353  | 0.352  |
| N3   | 0.003  | 0.024 | -0.004 | -0.002 | -0.002 |
| C4   | 0.089  | 0.075 | 0.097  | 0.095  | 0.095  |
| C5   | -0.014 | 0.000 | -0.019 | -0.018 | -0.018 |
| Cl   | 0.186  | 0.206 | 0.186  | 0.181  | 0.181  |
| O    | 0.175  | 0.167 | 0.174  | 0.181  | 0.182  |

<sup>a</sup>Blue and red values indicate sites of highest and lowest electrophilicity, respectively.

**Table S13.** Condensed nucleophilic Fukui functions ( $f^-$ ) (initial site of electrophilic attack) with the B3LYP, BLYP, M06, mPW1PW, and PBE1PBE and the def2-TZVPD basis set for dithiazolone **2b**.<sup>a</sup>

| Atom | B3LYP | BLYP  | M06   | mPW1PW | PBE1PBE |
|------|-------|-------|-------|--------|---------|
| S1   | 0.182 | 0.192 | 0.182 | 0.181  | 0.181   |
| S2   | 0.182 | 0.193 | 0.185 | 0.182  | 0.183   |
| N3   | 0.171 | 0.160 | 0.172 | 0.172  | 0.172   |
| C4   | 0.110 | 0.102 | 0.109 | 0.113  | 0.113   |
| C5   | 0.089 | 0.084 | 0.088 | 0.086  | 0.085   |
| Cl   | 0.117 | 0.121 | 0.120 | 0.117  | 0.116   |
| O    | 0.149 | 0.147 | 0.145 | 0.149  | 0.149   |

<sup>a</sup>Blue and red values indicate sites of highest and lowest nucleophilicity, respectively.



**Table S14.** Condensed radicalary attack Fukui functions ( $f^0$ ) (initial site of radical attack) with the B3LYP, BLYP, M06, mPW1PW, and PBE1PBE and the def2-TZVPD basis set for dithiazolone **2b**.<sup>a</sup>

| Atom | B3LYP | BLYP  | M06   | mPW1PW | PBE1PBE |
|------|-------|-------|-------|--------|---------|
| S1   | 0.200 | 0.208 | 0.200 | 0.196  | 0.195   |
| S2   | 0.262 | 0.249 | 0.266 | 0.268  | 0.268   |
| N3   | 0.087 | 0.092 | 0.084 | 0.085  | 0.085   |
| C4   | 0.100 | 0.089 | 0.103 | 0.104  | 0.104   |
| C5   | 0.038 | 0.042 | 0.034 | 0.034  | 0.034   |
| Cl   | 0.151 | 0.164 | 0.153 | 0.149  | 0.149   |
| O    | 0.162 | 0.157 | 0.160 | 0.165  | 0.165   |

<sup>a</sup>Blue and red values indicate sites of highest and lowest activity for radical attack, respectively.

**Table S15.** Condensed electrophilic Fukui functions ( $f^+$ ) (initial site of nucleophilic attack) with the B3LYP, BLYP, M06, mPW1PW, and PBE1PBE and the def2-TZVPD basis set for dithiazolethione **2c**.<sup>a</sup>

| Atom | B3LYP  | BLYP   | M06    | mMP1MP | PBE1PBE |
|------|--------|--------|--------|--------|---------|
| S1   | 0.201  | 0.181  | 0.202  | 0.200  | 0.199   |
| S2   | 0.273  | 0.241  | 0.273  | 0.276  | 0.275   |
| N3   | 0.024  | 0.039  | 0.019  | 0.021  | 0.021   |
| C4   | 0.052  | 0.034  | 0.057  | 0.056  | 0.056   |
| C5   | -0.056 | -0.058 | -0.070 | -0.063 | -0.063  |
| Cl   | 0.117  | 0.131  | 0.118  | 0.113  | 0.113   |
| S    | 0.389  | 0.432  | 0.402  | 0.398  | 0.399   |

<sup>a</sup>Blue and red values indicate sites of highest and lowest electrophilicity, respectively.



**Table S16.** Condensed nucleophilic Fukui functions ( $f^-$ ) (initial site of electrophilic attack) with the B3LYP, BLYP, M06, mPW1PW, and PBE1PBE and the def2-TZVPD basis set for dithiazoethione **2c**.<sup>a</sup>

| Atom | B3LYP | BLYP  | M06   | mMP1MP | PBE1PBE |
|------|-------|-------|-------|--------|---------|
| S1   | 0.171 | 0.174 | 0.171 | 0.172  | 0.172   |
| S2   | 0.173 | 0.181 | 0.175 | 0.173  | 0.173   |
| N3   | 0.136 | 0.131 | 0.135 | 0.136  | 0.137   |
| C4   | 0.032 | 0.041 | 0.026 | 0.031  | 0.031   |
| C5   | 0.074 | 0.062 | 0.075 | 0.075  | 0.074   |
| Cl   | 0.089 | 0.095 | 0.090 | 0.088  | 0.088   |
| S    | 0.326 | 0.317 | 0.330 | 0.327  | 0.326   |

<sup>a</sup>Blue and red values indicate sites of highest and lowest nucleophilicity, respectively.

**Table S17.** Condensed radicalary attack Fukui functions ( $f^0$ ) (initial site of radical attack) with the B3LYP, BLYP, M06, mPW1PW, and PBE1PBE and the def2-TZVPD basis set for dithiazoethione **2c**.<sup>a</sup>

| Atom | B3LYP | BLYP  | M06   | mMP1MP | PBE1PBE |
|------|-------|-------|-------|--------|---------|
| S1   | 0.186 | 0.178 | 0.186 | 0.186  | 0.186   |
| S2   | 0.223 | 0.211 | 0.224 | 0.224  | 0.224   |
| N3   | 0.080 | 0.085 | 0.077 | 0.078  | 0.079   |
| C4   | 0.042 | 0.037 | 0.041 | 0.043  | 0.044   |
| C5   | 0.009 | 0.002 | 0.002 | 0.006  | 0.006   |
| Cl   | 0.103 | 0.113 | 0.104 | 0.100  | 0.100   |
| S    | 0.358 | 0.374 | 0.366 | 0.362  | 0.362   |

<sup>a</sup>Blue and red values indicate sites of highest and lowest activity for radical attack, respectively.



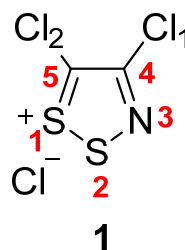

**Table S18.** Condensed electrophilic Fukui functions ( $f^+$ ) (initial site of nucleophilic attack) with the B3LYP, BLYP, M06, mPW1PW, and PBE1PBE and the def2-TZVPD basis set for the Appel's salt **1**.<sup>a</sup>

| Atom | B3LYP  | BLYP  | M06    | mPW1PW | PBE    |
|------|--------|-------|--------|--------|--------|
| S1   | 0.231  | 0.230 | 0.234  | 0.233  | 0.233  |
| S2   | 0.243  | 0.238 | 0.247  | 0.245  | 0.245  |
| C4   | 0.127  | 0.113 | 0.126  | 0.128  | 0.128  |
| C5   | -0.008 | 0.004 | -0.010 | -0.009 | -0.009 |
| N3   | 0.134  | 0.129 | 0.129  | 0.134  | 0.135  |
| Cl2  | 0.108  | 0.116 | 0.109  | 0.107  | 0.107  |
| Cl1  | 0.164  | 0.170 | 0.165  | 0.162  | 0.161  |

<sup>a</sup> Blue and red values indicate sites of highest and lowest electrophilicity, respectively.



**Table S19.** Condensed nucleophilic Fukui functions ( $f^-$ ) (initial site of electrophilic attack) with the B3LYP, BLYP, M06, mPW1PW, and PBE1PBE and the def2-TZVPD basis set for the Appel's salt **1**.<sup>a</sup>

| Atom | B3LYP | BLYP  | M06   | mPW1PW | PBE1PBE |
|------|-------|-------|-------|--------|---------|
| S1   | 0.281 | 0.263 | 0.291 | 0.287  | 0.287   |
| S2   | 0.110 | 0.126 | 0.105 | 0.103  | 0.103   |
| C4   | 0.027 | 0.020 | 0.033 | 0.032  | 0.032   |
| C5   | 0.038 | 0.036 | 0.045 | 0.039  | 0.039   |
| N3   | 0.019 | 0.031 | 0.014 | 0.016  | 0.016   |
| Cl2  | 0.312 | 0.309 | 0.301 | 0.308  | 0.308   |
| Cl1  | 0.213 | 0.216 | 0.211 | 0.215  | 0.216   |

<sup>a</sup>Blue and red values indicate sites of highest and lowest nucleophilicity, respectively.

**Table S20.** Condensed radicalary attack Fukui functions ( $f^0$ ) (initial site of radical attack) with the B3LYP, BLYP, M06, mPW1PW, and PBE1PBE and the def2-TZVPD basis set for the Appel's salt **1**.<sup>a</sup>

| Atom | B3LYP | BLYP  | M06   | mPW1PW | PBE1PBE |
|------|-------|-------|-------|--------|---------|
| S1   | 0.256 | 0.246 | 0.263 | 0.260  | 0.260   |
| S2   | 0.176 | 0.182 | 0.176 | 0.174  | 0.174   |
| N3   | 0.077 | 0.067 | 0.080 | 0.080  | 0.080   |
| C4   | 0.015 | 0.020 | 0.018 | 0.015  | 0.015   |
| C5   | 0.077 | 0.080 | 0.072 | 0.075  | 0.075   |
| Cl2  | 0.210 | 0.213 | 0.205 | 0.207  | 0.207   |
| Cl1  | 0.188 | 0.193 | 0.188 | 0.188  | 0.189   |

<sup>a</sup>Blue and red values indicate sites of highest and lowest activity for radical attack, respectively.



**Table S21.** Experimental and computational bond lengths (Å) of the Appel's salt **1**.<sup>a</sup>

| Bond   | X-Ray Data | Expt Range  | B3LYP | BLYP  | M06   | mPW1PW | PBE   | MP2   |
|--------|------------|-------------|-------|-------|-------|--------|-------|-------|
| C5–S1  | 1.674(4)   | 1.670-1.678 | 1.691 | 1.711 | 1.684 | 1.681  | 1.681 | 1.694 |
| S1–S2  | 2.032(1)   | 2.031-2.033 | 2.069 | 2.112 | 2.058 | 2.040  | 2.038 | 2.024 |
| S2–N3  | 1.611(3)   | 1.608-1.614 | 1.592 | 1.609 | 1.582 | 1.583  | 1.583 | 1.591 |
| N3–C4  | 1.301 (5)  | 1.296-1.306 | 1.310 | 1.324 | 1.304 | 1.307  | 1.308 | 1.335 |
| C5–C4  | 1.405(5)   | 1.400-1.410 | 1.431 | 1.443 | 1.426 | 1.427  | 1.427 | 1.418 |
| C5–Cl2 | 1.681(4)   | 1.677-1.685 | 1.675 | 1.690 | 1.665 | 1.663  | 1.662 | 1.675 |
| C4–Cl1 | 1.709(4)   | 1.705-1.713 | 1.693 | 1.708 | 1.683 | 1.679  | 1.678 | 1.677 |

<sup>a</sup>Blue and red bond lengths are within and out of the experimental range, respectively.**Table S22.** Experimental and computational bond angles (°) of the Appel's salt **1**.<sup>a</sup>

| Angles    | X-Ray Data | Expt Range  | B3LYP  | BLYP   | M06    | mPW1PW | PBE1PBE | MP2    |
|-----------|------------|-------------|--------|--------|--------|--------|---------|--------|
| C5–S1–S2  | 93.0(1)    | 93.1-92.9   | 92.07  | 91.41  | 91.95  | 92.42  | 92.44   | 92.54  |
| S1–S2–N3  | 97.4(1)    | 97.5-97.3   | 97.44  | 97.43  | 97.66  | 97.91  | 97.99   | 99.29  |
| S2–N3–C4  | 116.3(3)   | 116.0-116.6 | 118.25 | 118.16 | 118.25 | 117.89 | 117.79  | 115.78 |
| N3–C4–C5  | 118.7(3)   | 119.0-118.4 | 117.09 | 117.44 | 117.01 | 116.97 | 116.98  | 117.88 |
| N3–C4–Cl2 | 119.7(3)   | 120.0-119.4 | 121.04 | 120.72 | 121.53 | 121.32 | 121.35  | 120.23 |
| C5–C4–Cl2 | 121.6(3)   | 121.9-121.3 | 121.87 | 121.85 | 121.46 | 121.71 | 121.67  | 121.90 |
| C4–C5–S1  | 114.6(3)   | 114.9-114.3 | 115.10 | 115.56 | 115.14 | 114.82 | 114.79  | 114.52 |
| C4–C5–Cl1 | 125.7(3)   | 126.0-125.4 | 124.37 | 124.29 | 124.20 | 124.38 | 124.38  | 124.86 |
| S1–C5–Cl1 | 119.7(2)   | 119.9-119.5 | 120.53 | 120.15 | 120.66 | 120.79 | 120.83  | 120.63 |

<sup>a</sup>Blue and red bond angles are within and out of the experimental range, respectively.
